# Supplementary material for: Synthesis and water oxidation electrocatalytic and electrochromic behaviours of mesoporous nickel oxide thin film electrodes
Source: Royal Society of Chemistry journal article supplement (doi:10.1039/c9ta07693j), 2019-01-01
Supplement: c9ta07693j1.pdf [file c9ta07693j1.pdf]

## Supporting Information

### Synthesis and Water Oxidation Electrocatalytic and Electrochromic Behaviors of Mesoporous Nickel Oxide Thin Film Electrodes

Assel Amirzhanova,<sup>1</sup> Irmak Karakaya,<sup>1</sup> Can Berk Uzundal,<sup>1</sup> Gözde Karaoğlu,<sup>1</sup> Ferdi Karadas,<sup>1,2</sup> Burak Ülgüt\*,<sup>1</sup> Ömer Dag\*<sup>1,2</sup>.

<sup>1</sup>Department of Chemistry, Bilkent University, 06800, Ankara, Turkey.

<sup>2</sup>UNAM — National Nanotechnology Research Center and Institute of Materials Science and Nanotechnology, Bilkent University, 06800, Ankara, Turkey.

**Table S1.** Composition of the clear solutions, used for the preparations of mesoporous NiO films.

| Ni(II)/C <sub>12</sub> E <sub>10</sub><br>Mole Ratio |  | Amount of<br>[Ni(OH) <sub>2</sub> ] <sub>6</sub> (NO <sub>3</sub> ) <sub>2</sub><br>(g) | Amount of<br>CTAB (g) | Amount of<br>C <sub>12</sub> E <sub>10</sub> (g) | Amount of<br>Ethanol (ml) |
|------------------------------------------------------|--|-----------------------------------------------------------------------------------------|-----------------------|--------------------------------------------------|---------------------------|
| 2:1                                                  |  | 0.4368                                                                                  | 0.2908                | 0.500                                            | 5                         |
| 4:1                                                  |  | 0.9282                                                                                  | 0.2908                | 0.500                                            | 5                         |
| 6:1                                                  |  | 1.3923                                                                                  | 0.2908                | 0.500                                            | 5                         |
| 8:1                                                  |  | 1.8564                                                                                  | 0.2908                | 0.500                                            | 5                         |
| 10:1                                                 |  | 2.3205                                                                                  | 0.2908                | 0.500                                            | 5                         |
| 12:1                                                 |  | 2.7532                                                                                  | 0.2908                | 0.500                                            | 5                         |
| 15:1                                                 |  | 3.4808                                                                                  | 0.2908                | 0.500                                            | 10                        |
| 20:1                                                 |  | 4.6410                                                                                  | 0.2908                | 0.500                                            | 10                        |
| 25:1                                                 |  | 5.8010                                                                                  | 0.2908                | 0.500                                            | 10                        |
| 30:1                                                 |  | 6.9615                                                                                  | 0.2908                | 0.500                                            | 10                        |

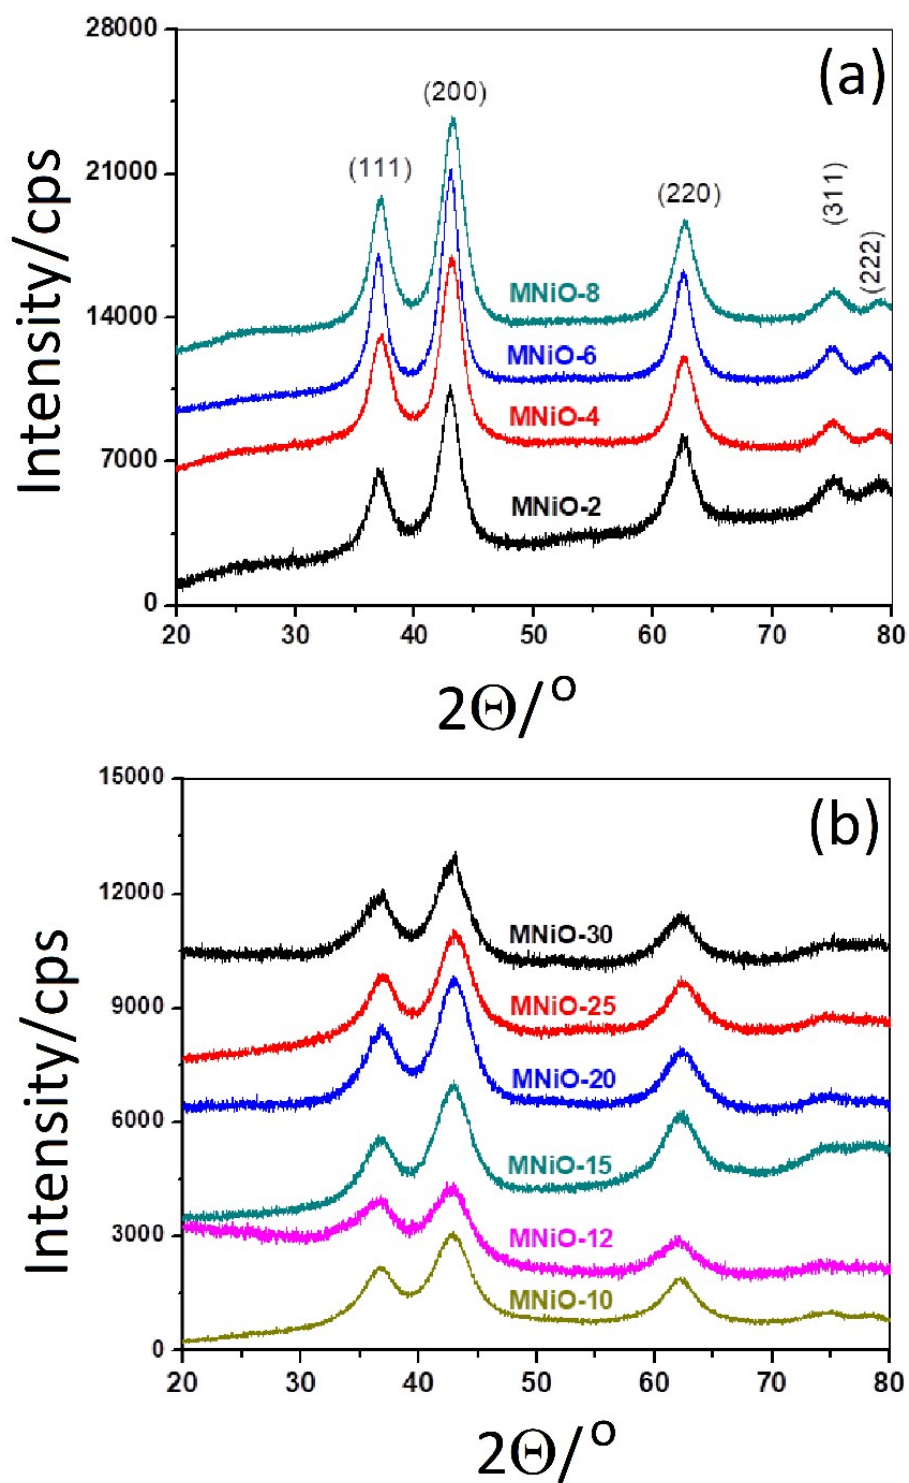

**Figure S1.** XRD patterns of mesoporous NiO, prepared using (a) small and (high) Ni(II)/C<sub>12</sub>E<sub>10</sub> mole ratio solutions and calcination at 300 °C.

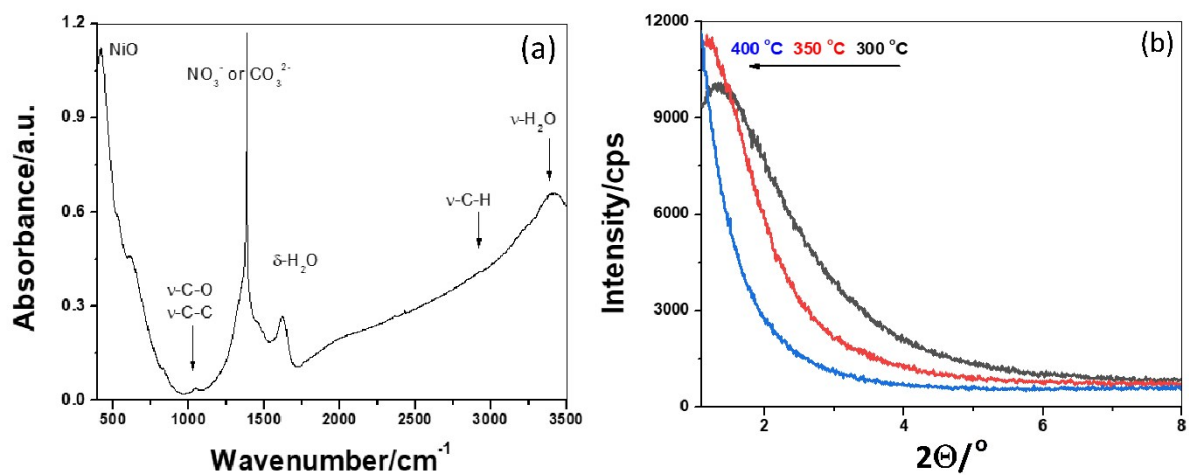

**Figure S2.** (a) FTIR spectrum of m-NiO-10-300 and (b) XRD patterns of m-NiO-10-300, m-NiO-10-350, and m-NiO-10-400.

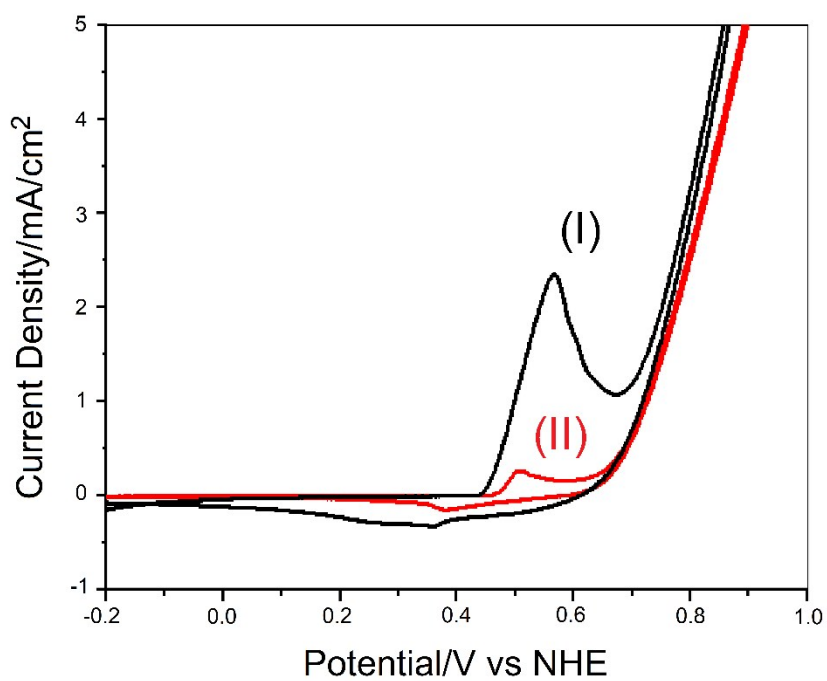

**Figure S3.** CV of fresh (I) and aged (II) mesoporous Ni(OH)<sub>2</sub> in 1 M KOH solution.

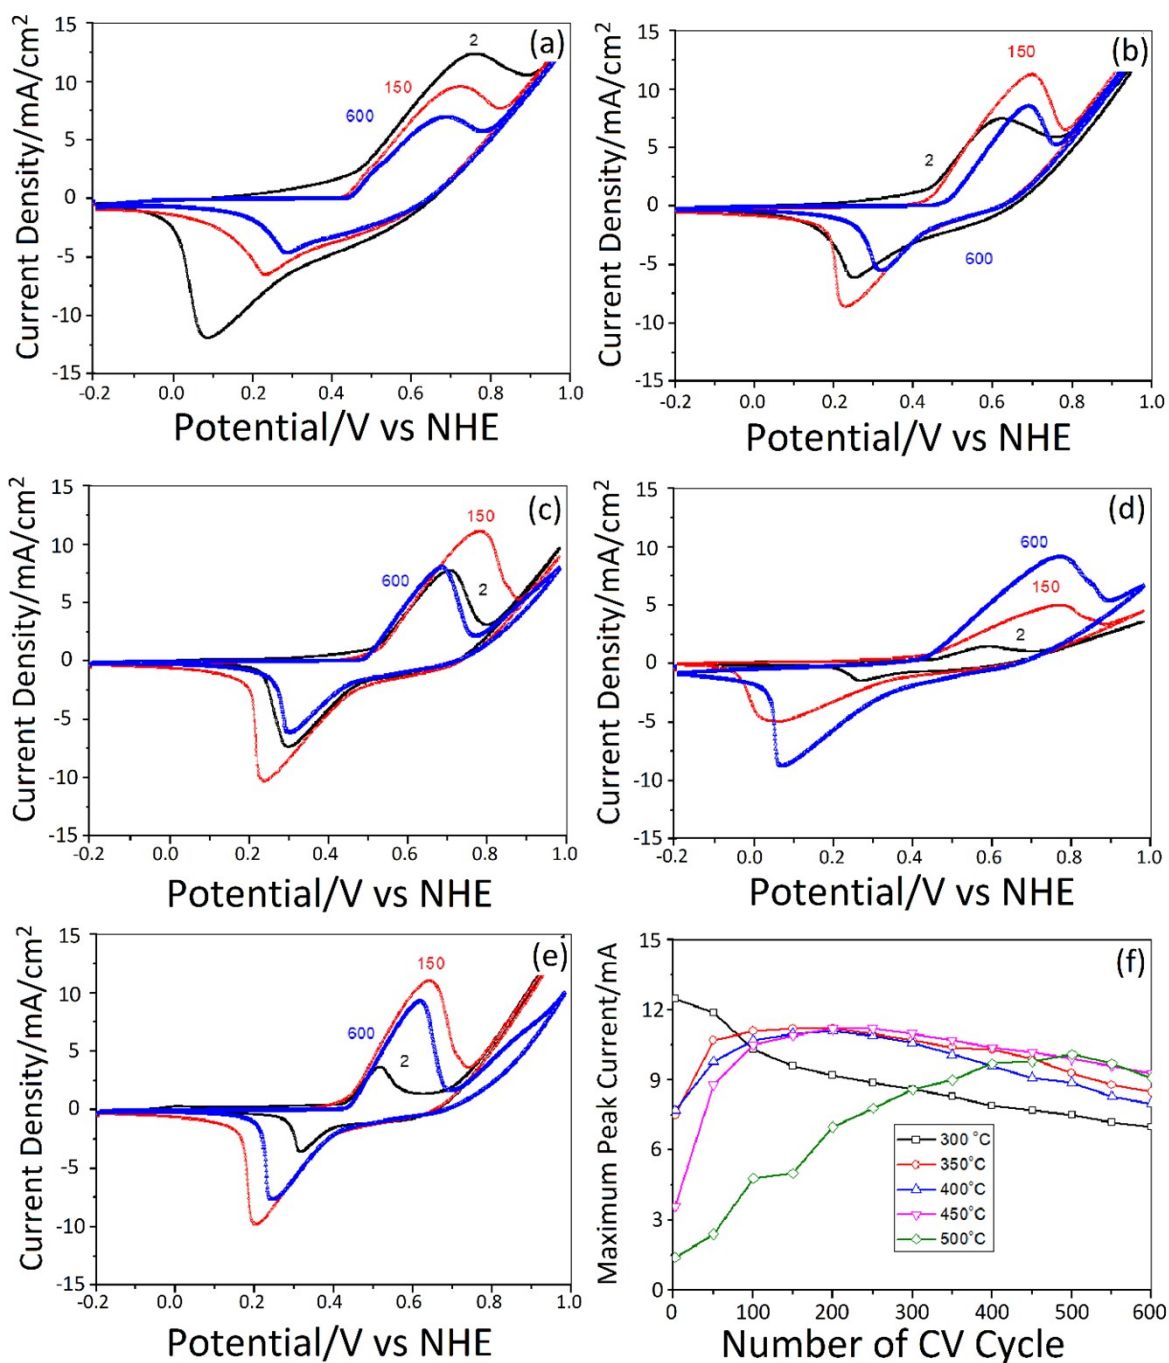

**Figure S4.** Time dependent CV cycles (2<sup>nd</sup>, 150<sup>th</sup> and 600<sup>th</sup> cycles) of m-NiO-10 calcined/annealed at (a) 300, (b) 350, (c) 400, (d) 450, and (e) 500 °C and (f) overall change in peak current at around 0.6 V over cycling.

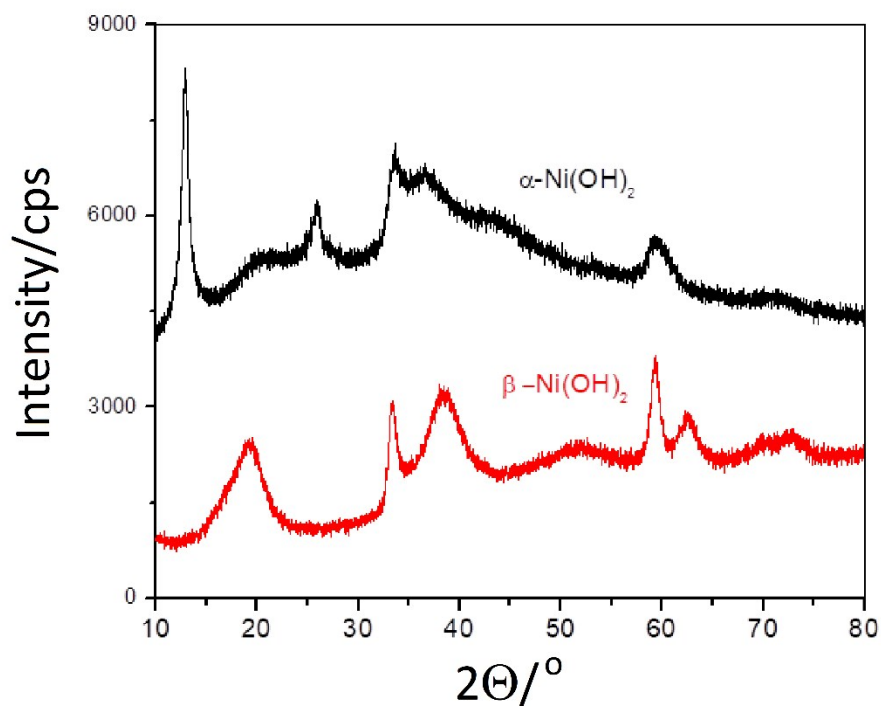

**Figure S5.** XRD of Ni(OH)<sub>2</sub> (top) the fresh and (bottom) aged in 1M KOH solution for 1 day.

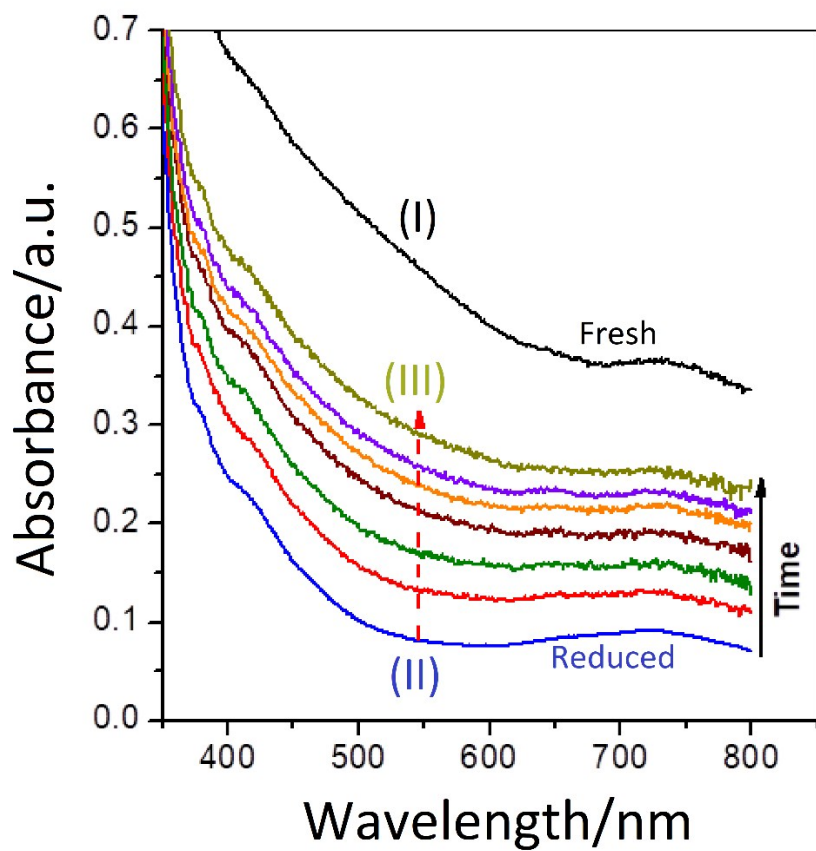

**Figure S6.** UV-Vis spectra of m-NiO calcined at 300 °C, (I) fresh sample, (II) the same sample treated with NaBH<sub>4</sub> solution and (II) to (III) washed and aged under ambient condition for bottom to top 5, 10, 25, 45, 60, and 300 min.

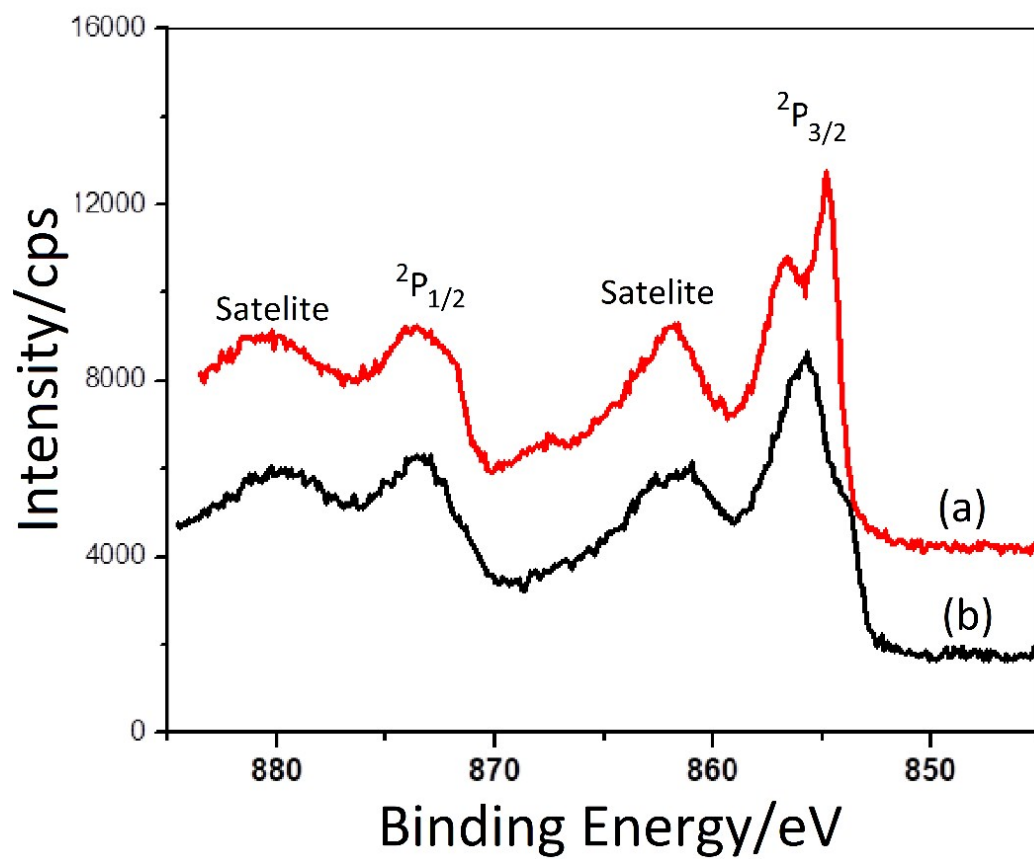

**Figure S7.** XPS spectra of m-NiO before and after CV (1000 cycle).

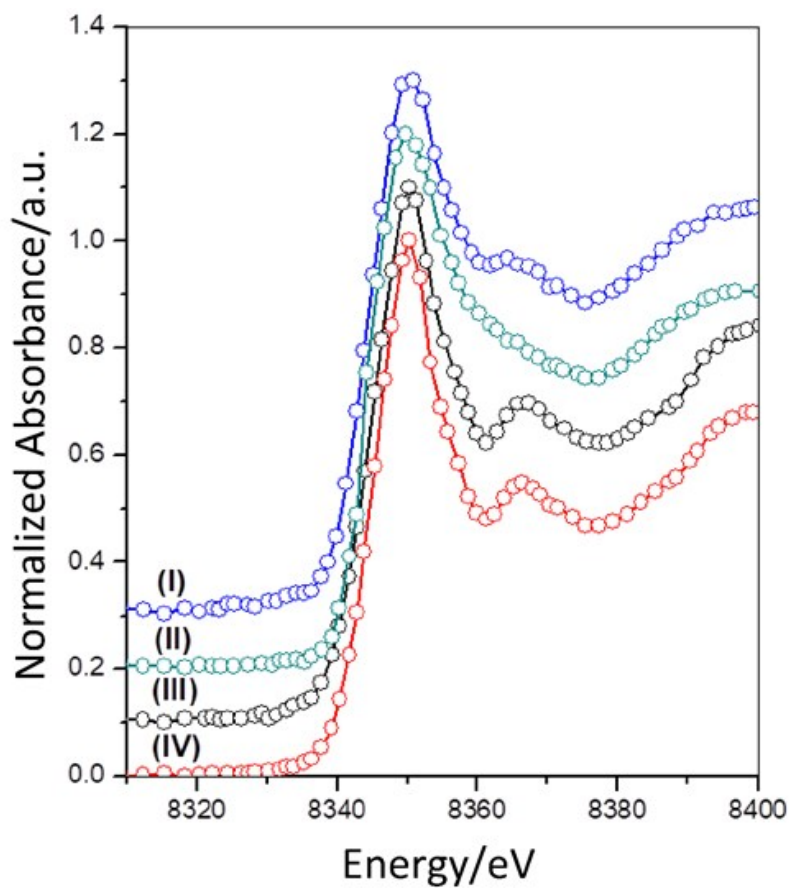

**Figure S8.** Ni K-edge XANES spectra of (I) *m*-Ni(OH)<sub>2</sub>, (II) *m*-NiO-10-300, (III) *m*-NiO-10-400. (IV) *m*-NiO-10-400 after 1000 CV cycles.

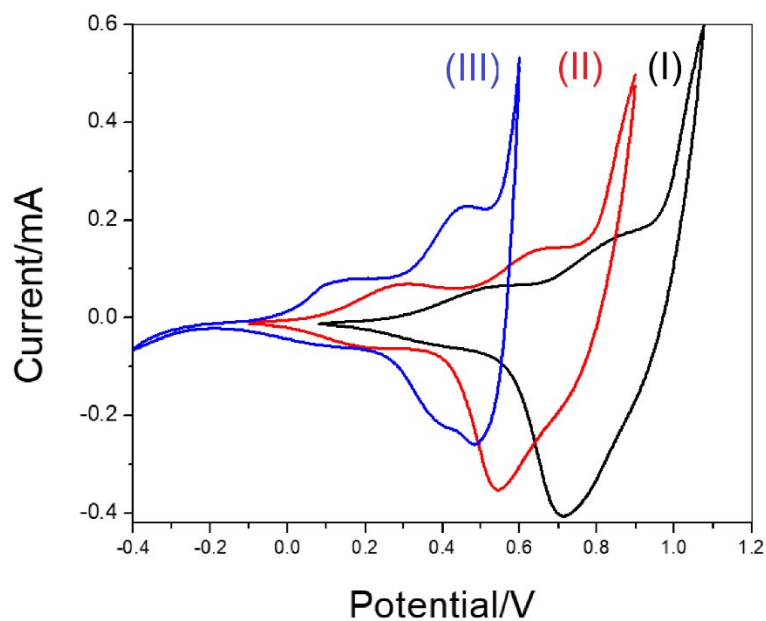

**Figure S9.** CVs of *m*-NiO-10-300 at 3 different pH values of (I) 7, (II) 10.2, and (III) 12.85.



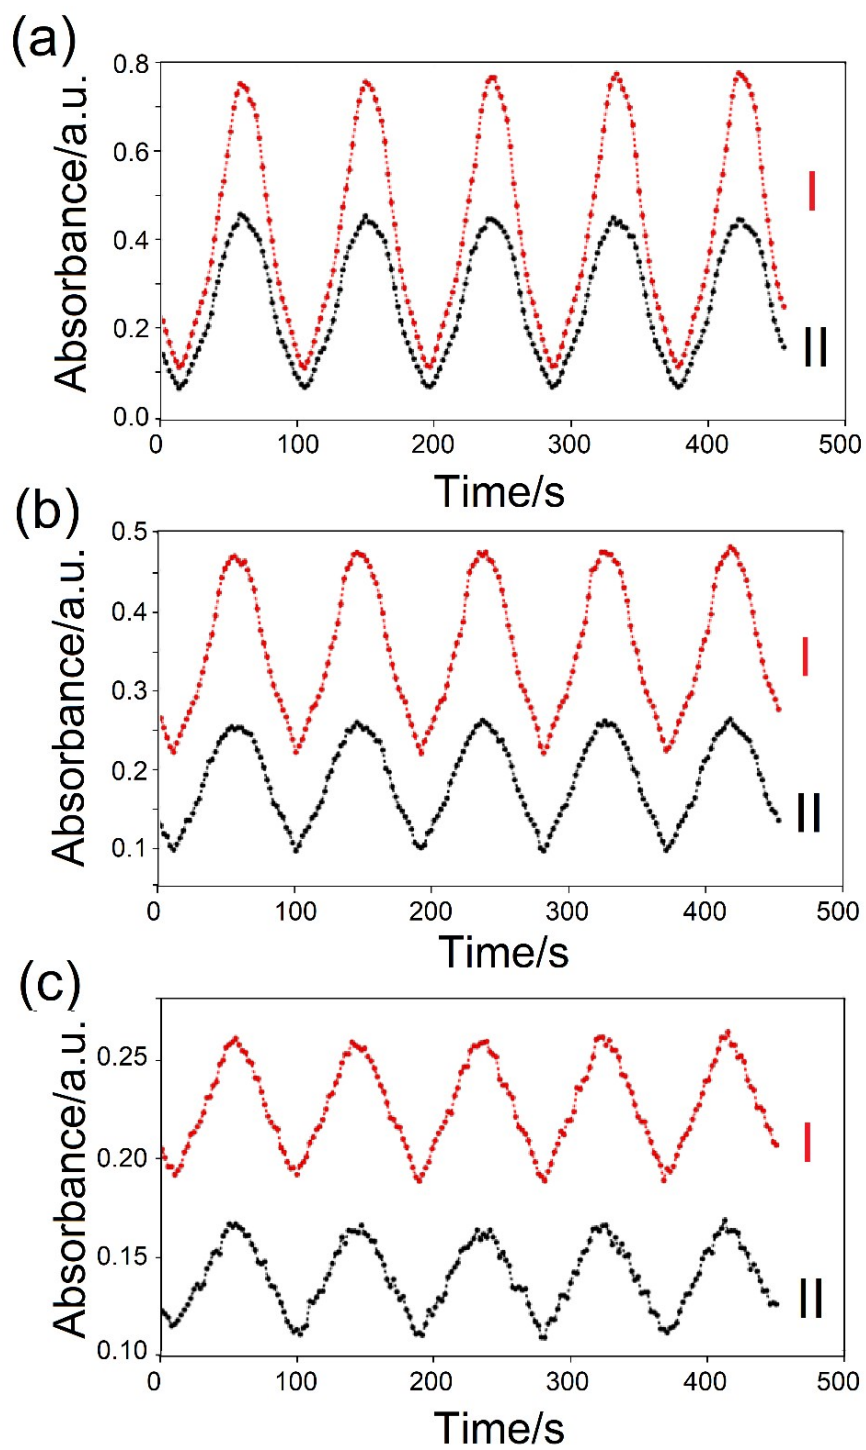

**Figure S10.** Electrochromic (absorbance vs time plot) behavior of *m*-NiO-10, calcined at (a) 300, (b) 400, and (c) 500 °C. Absorbance values: (I) 585 nm and (II) 886 nm.



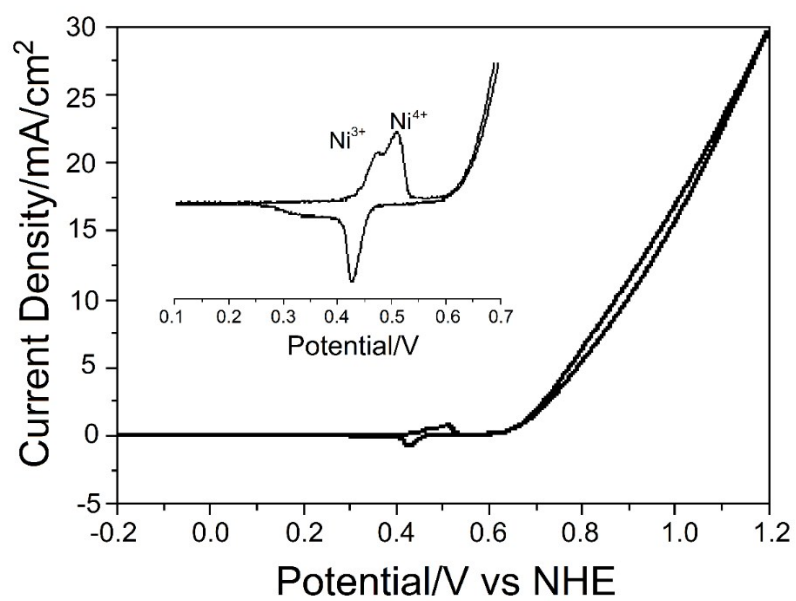

**Figure S11.** CV of m-NiO-10-400 with a scan rate of 1 mV/S.

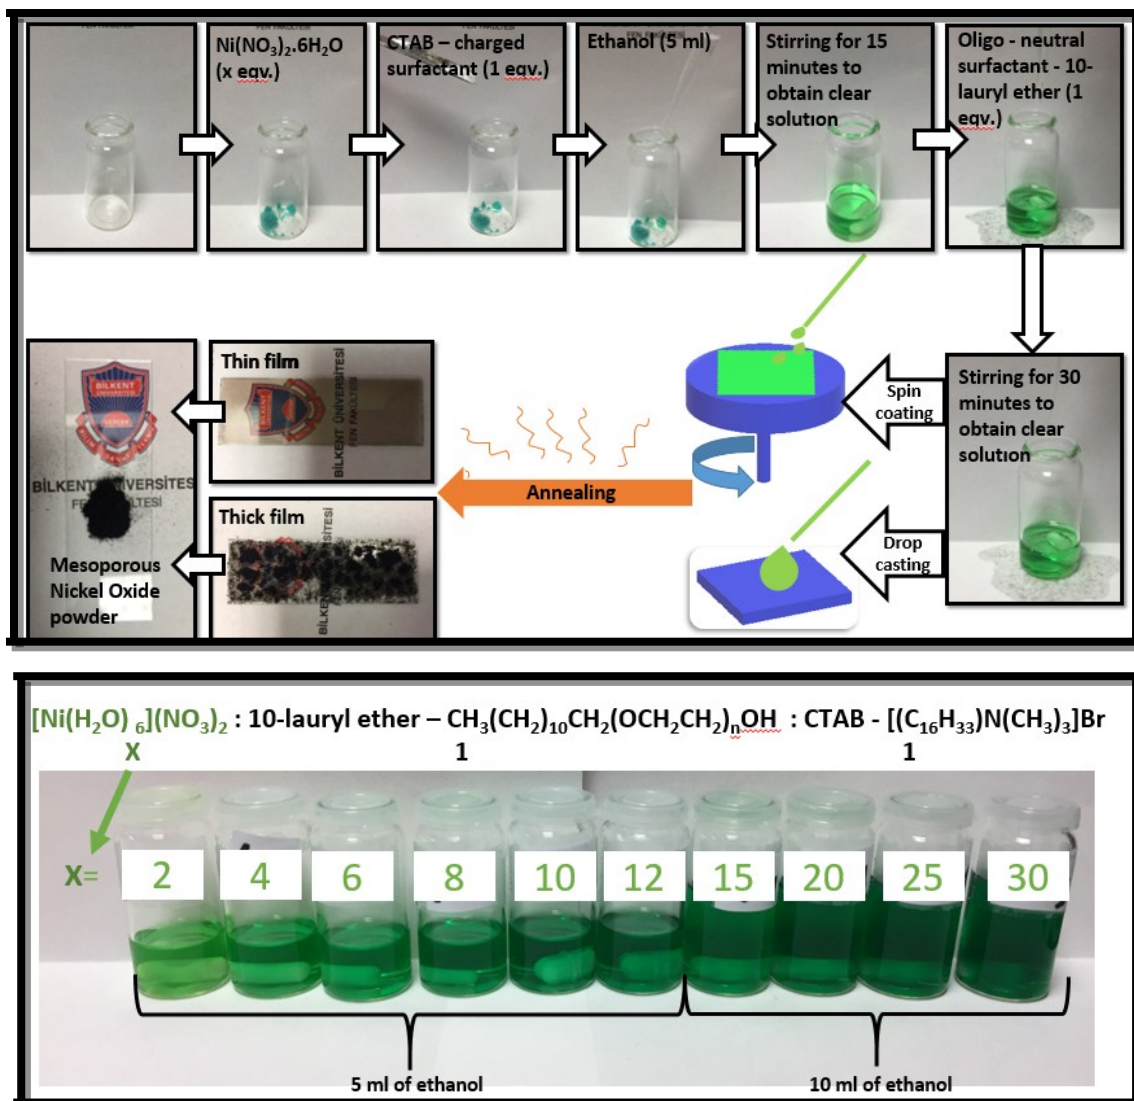

**Figure S12.** Schematic representation of the procedure (top) and photographs of the clear solutions at various concentrations (bottom).
